# Supplementary material for: Biomarker-assessed passive smoking in relation to cause-specific mortality: pooled data from 12 prospective cohort studies comprising 36 584 individuals
Source: HighWire-hosted journal article supplement (doi:10.1136/jech-2020-215398), 2021-02-04
Supplement: jech-2020-215398supp001_data_supplement.pdf [file jech-2020-215398supp001_data_supplement.pdf]

Supplementary Table. Hazard ratios (95% confidence interval) for the association between mortality and self-reported smoking status in 51 417 men and women

|                                         | Smoking status |                     |                      |                     |
|-----------------------------------------|----------------|---------------------|----------------------|---------------------|
|                                         | Non-smokers    | Current smokers     |                      |                     |
|                                         |                | <10 cigarettes/day  | 10-19 cigarettes/day | 20+ cigarettes/day  |
| <b>N</b>                                | 38 555         | 3707                | 5137                 | 4018                |
| <b>Total mortality</b>                  |                |                     |                      |                     |
| No. of deaths                           | 2542           | 210                 | 361                  | 399                 |
| HR (95 % CI)                            | 1 (Ref.)       | 1.93<br>(1.67-2.22) | 2.12<br>(1.89-2.37)  | 2.47<br>(2.21-2.75) |
| <b>Cardiovascular disease mortality</b> |                |                     |                      |                     |
| No. of deaths                           | 837            | 61                  | 111                  | 94                  |
| HR (95 % CI)                            | 1 (Ref.)       | 1.77<br>(1.36-2.30) | 2.19<br>(1.79-2.68)  | 1.95<br>(1.56-2.42) |
| <b>Cancer mortality</b>                 |                |                     |                      |                     |
| No. of deaths                           | 841            | 66                  | 113                  | 153                 |
| HR (95 % CI)                            | 1 (Ref.)       | 1.70<br>(1.32-2.19) | 1.76<br>(1.44-2.16)  | 2.49<br>(2.08-2.99) |
| <b>Smoking-related cancer mortality</b> |                |                     |                      |                     |
| No. of deaths                           | 317            | 36                  | 64                   | 99                  |
| HR (95 % CI)                            | 1 (Ref.)       | 2.52<br>(1.78-3.57) | 2.70<br>(2.05-3.56)  | 4.22<br>(3.32-5.36) |

Hazard ratios are adjusted for sex, age, survey, social class, longstanding illness and alcohol intake. The non-smoker comprises never and former smokers
